# Supplementary material for: Ag doping induced abnormal lattice thermal conductivity in Cu2Se
Source: Royal Society of Chemistry journal article supplement (doi:10.1039/c8tc04129f), 2018-01-01
Supplement: c8tc04129f1.pdf [file c8tc04129f1.pdf]

## Ag doping induced abnormal lattice thermal conductivity in Cu<sub>2</sub>Se

Weidi Liu,<sup>a</sup> Xiaolei Shi,<sup>a</sup> Min Hong,<sup>b, a</sup> Lei Yang,<sup>c</sup> Raza Moshwan,<sup>a</sup> Zhi-Gang Chen,<sup>b, a, \*</sup> Jin Zou<sup>a, d, \*</sup>

<sup>a</sup> *Materials Engineering, The University of Queensland, Brisbane, Queensland 4072, Australia.*

<sup>b</sup> *Centre for Future Materials, University of Southern Queensland, Springfield, Queensland 4300, Australia.*

<sup>c</sup> *School of Materials Science and Engineering, Sichuan University, Chengdu 610065, China*

<sup>d</sup> *Centre for Microscopy and Microanalysis, The University of Queensland, Brisbane, Queensland 4072, Australia.*

\* Corresponding author. Email: [zhigang.chen@usq.edu.au](mailto:zhigang.chen@usq.edu.au); [j.zou@uq.edu.au](mailto:j.zou@uq.edu.au);

*Keywords:* Thermoelectric performance, Cu<sub>2</sub>Se, Ag dopants, Carrier transport properties.

# 1. Rietveld refinement calculated $\text{Cu}_2\text{O}$ content and its influence on thermoelectric performance of $\text{Cu}_2\text{Se}$

Figure S1a and b show the experimental XRD patterns in comparison with the Rietveld refinement calculated ones of as-sintered  $(\text{Cu}_{1-x}\text{Ag}_x)_2\text{Se}$  pellets and the calculated the  $\text{Cu}_2\text{O}$  ratios. The  $R_{\text{wp}}$  values for  $(\text{Cu}_{1-x}\text{Ag}_x)_2\text{Se}$  with  $x=0, 0.005$  and  $0.01$  are 7.9, 6.8 and 7.2 %, respectively. As can be seen, with increasing the Ag-doping level, the  $\text{Cu}_2\text{O}$  content increases up to 3.5 at. %. This fraction is lower than the critical point of  $\sim 7$  at. %.[1] Below this point,  $\text{Cu}_2\text{O}$  has minor influence on thermoelectric performance of as-prepared  $(\text{Cu}_{1-x}\text{Ag}_x)_2\text{Se}$ . [1]

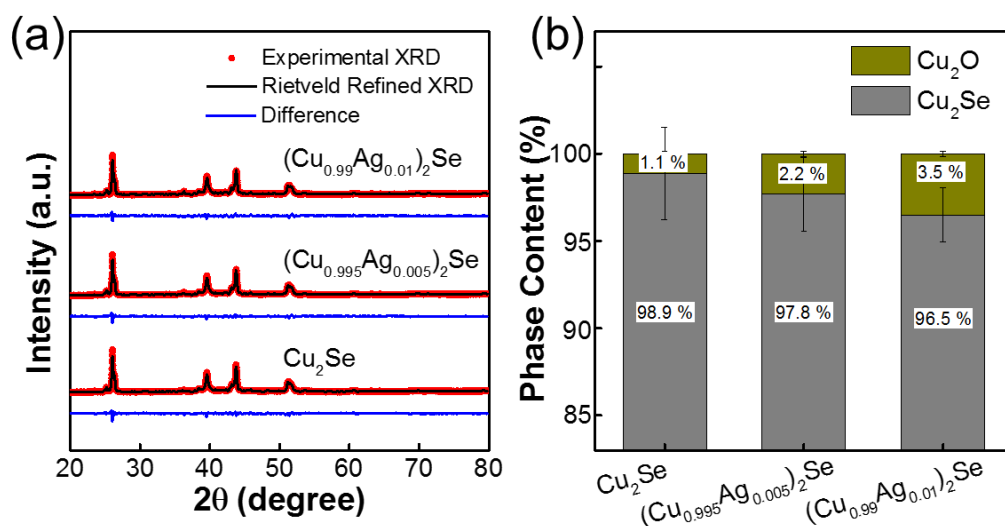

**Figure S1.** (a) Experimental and Rietveld refinement calculated XRD patterns and (b) Rietveld refinement calculated phase content of as-prepared  $\text{Cu}_2\text{Se}$ ,  $(\text{Cu}_{0.995}\text{Ag}_{0.005})_2\text{Se}$  and  $(\text{Cu}_{0.99}\text{Ag}_{0.01})_2\text{Se}$  pellets.

## 2. Temperature-dependent specific heat of as-prepared $(\text{Cu}_{1-x}\text{Ag}_x)_2\text{Se}$ pellets

The temperature-dependent specific heat ( $C_p$ ) of as-prepared  $(\text{Cu}_{1-x}\text{Ag}_x)_2\text{Se}$  pellets are shown in Figure S2 (refer to Figure R2). The peaks at  $\sim 400$  K of all samples clearly revealed the well-known phase transition from  $\alpha\text{-Cu}_2\text{Se}$  to  $\beta\text{-Cu}_2\text{Se}$  at  $\sim 400$  K.[2, 3] Here, we are mainly focusing on thermoelectric performance of  $(\text{Cu}_{1-x}\text{Ag}_x)_2\text{Se}$  pellets after the phase transition where the temperature is higher than 423 K.

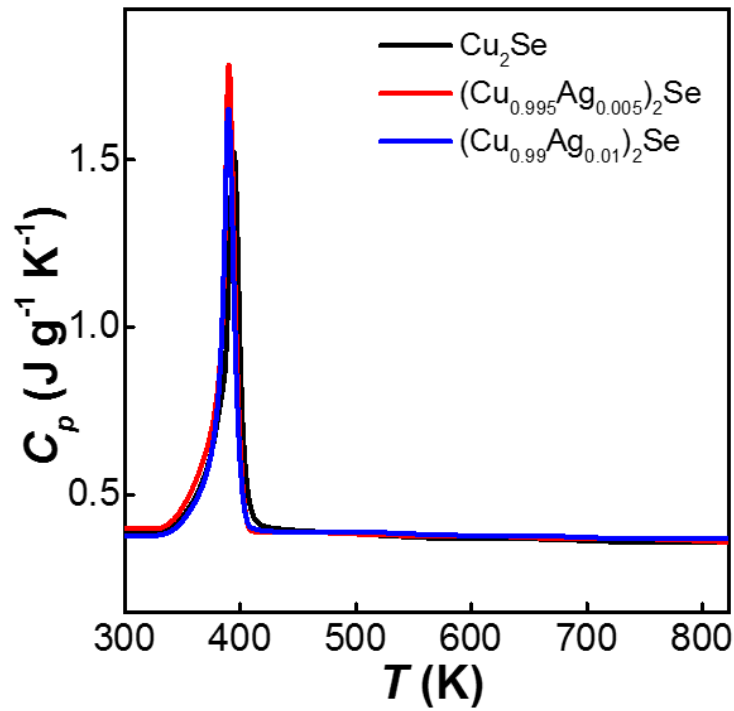

**Figure S2.** Temperature ( $T$ )-dependent specific heat ( $C_p$ ) of as-prepared  $(\text{Cu}_{1-x}\text{Ag}_x)_2\text{Se}$  pellets.

## Reference

- [1] A. S. Ivanov, Y. E. Kalinin, V. V. Bavykin, A. S. Shuvayev, *Inorg. Mater. Appl. Res.* 8 (2017) 50.
- [2] A. A. Olvera, N. A. Moroz, P. Sahoo, P. Ren, T. P. Bailey, A. A. Page, C. Uher, P. F. P. Poudeu, *Energy Environ. Sci.* 10 (2017) 1668.
- [3] L. Yang, Z. G. Chen, G. Han, M. Hong, J. Zou, *Acta Mater.* 113 (2016) 140.
